# Supplementary material for: Dynamics of nanoparticle tracers in supercooled nanoparticle matrices
Source: Royal Society of Chemistry journal article supplement (doi:10.1039/d4sm01106f), 2024-12-11
Supplement: d4sm01106f1.pdf [file d4sm01106f1.pdf]

# Electronic Supporting Information: Dynamics of nanoparticle tracers in supercooled nanoparticle matrices

Peter Edimeh, Ali H. Slim, and Jacinta C. Conrad\*

## Determination of the matrix volume fraction $\phi$

The volume fraction  $\phi$  of polystyrene (PS) particles within a suspension was determined by tracking the mass of the sample before and after samples were concentrated via centrifugation. First, the masses of the empty centrifuge membrane  $M_m$  and filter tube  $M_{ft}$  were determined. Using a pipette, 400  $\mu\text{L}$  of the PS suspension with  $\phi_{PS} = 10\%$  (mass  $M_t$ ) was transferred into the centrifuge apparatus and the total mass of the centrifuge assembly (membrane, filter, and suspension)  $M_{asm}$  was measured. The initial mass of the PS suspension  $M_s$  was calculated by subtracting the mass of the assembled empty components from the mass of the assembly containing the suspension  $M_s = M_{asm} - (M_m + M_{ft})$ . We estimated that the mass of PS particles  $M_{PS} = 0.1M_s$  (based on the weight fraction) and then calculated the volume of PS particles  $V_{PS}/\rho_{PS}$ , where  $\rho_{PS} = 1.055 \times 10^{12} \text{ g } \mu\text{m}^{-3}$ . Similarly, the mass of water  $M_w = M_s - M_{PS}$  and the volume of water  $V_w = M_w/\rho_w$ , where  $\rho_w = 0.997 \times 10^{12} \text{ g } \mu\text{m}^{-3}$ . The total suspension volume was  $V_t = V_{PS} + V_w$ , leading to the initial volume fraction  $\phi_i = V_{PS}/V_t$ .

Suspensions were centrifuged at 8000 rpm for a given duration depending on desired  $\phi$ . We measured the mass of the membrane + residue,  $M_{m+r}$  and the mass of the filter tube containing the filtrate  $M_{ft+f}$  and subsequently determined the residue mass  $M_r = M_{m+r} - M_m$  and filtrate mass  $M_f = M_{ft+f} - M_{ft}$ . The residue contained PS particles along with a small amount of water of mass  $M_{r,w} = M_r - M_{PS}$ . The volume of water in the residue was then  $V_{r,w} = M_{r,w}/\rho_w$ . We assumed that the volume of PS in the residue did not change, i.e.  $V_{r,PS} = M_{PS}/\rho_{PS}$ . The total volume of the residue  $V_r = V_{r,w} + V_{r,PS}$ . Finally, we determined  $\phi = V_{PS}/V_r$ . This process was designed to achieve an absolute error on the determination of  $\phi$  within 3%, consistent with the typical error in determining colloidal  $\phi^1$ . We note, however, that  $\phi$  is increased through the duration of centrifugation, and so the relative volume fractions are consistent.

### Tracking resolution $\epsilon$

| $\delta$ | $\phi$      | G:W | $\Delta x$ ( $\mu\text{m}$ ) | $\epsilon$ ( $\mu\text{m}$ ) | N (pixel $\times$ pixel) | N( $\mu\text{m} \times \mu\text{m}$ ) |
|----------|-------------|-----|------------------------------|------------------------------|--------------------------|---------------------------------------|
| 0.71     | $\leq 0.45$ | 5:6 | 0.228                        | 0.155                        | 256 $\times$ 256         | 58.4 $\times$ 58.4                    |
| 0.71     | $> 0.45$    | 5:6 | 0.152                        | 0.105                        | 256 $\times$ 256         | 38.9 $\times$ 38.9                    |
| 0.45     | $\geq 0.45$ | 6:5 | 0.114                        | 0.059                        | 256 $\times$ 256         | 29.2 $\times$ 29.2                    |
| 0.36     | $\leq 0.46$ | 6:5 | 0.114                        | 0.255                        | 256 $\times$ 256         | 29.2 $\times$ 29.2                    |
| 0.36     | $> 0.46$    | 6:5 | 0.091                        | 0.214                        | 256 $\times$ 256         | 23.3 $\times$ 23.3                    |
| 0.34     | $\leq 0.45$ | 6:5 | 0.091                        | 0.231                        | 256 $\times$ 256         | 23.3 $\times$ 23.3                    |
| 0.34     | $> 0.45$    | 6:5 | 0.076                        | 0.175                        | 256 $\times$ 256         | 19.5 $\times$ 19.5                    |

**Table S1:** Values of the tracking resolution  $\epsilon$  for the given tracer-matrix size ratio ( $\delta$ ), glycerol: water mixing ratio (G:W), and volume fraction ( $\phi$ ) values;  $\Delta x$  is the pixel size used in each series of experiments and N is the 2D-image size in (pixel  $\times$  pixel) and ( $\mu\text{m} \times \mu\text{m}$ ).

Supplementary tracking figures

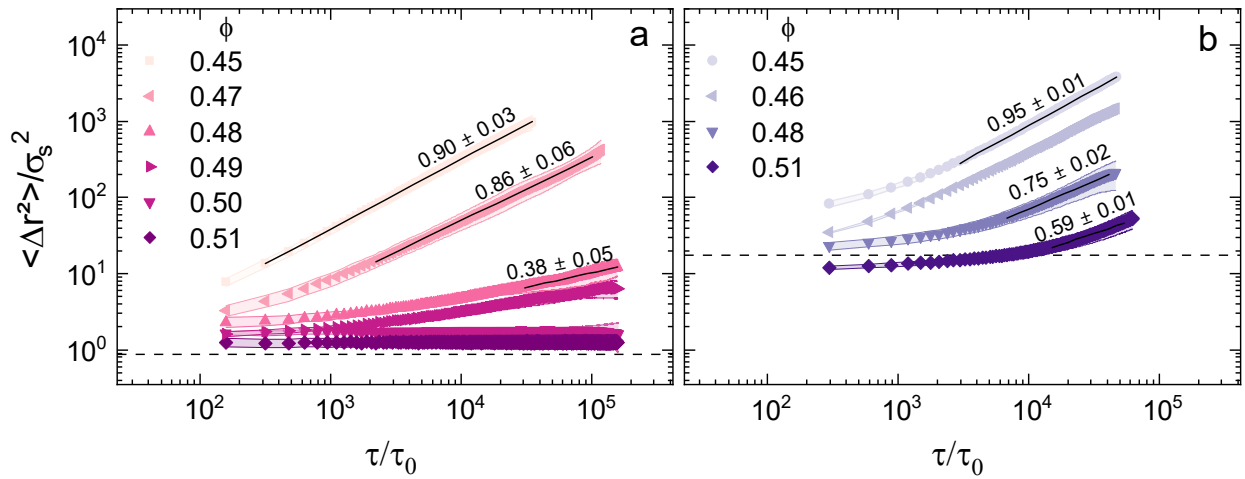

**Figure S1:** Ensemble averaged mean-squared displacement (MSD)  $\langle \Delta r^2 \rangle$  normalized by tracer diameter  $\sigma_s^2$  as a function of lag time  $\tau$  normalized by Brownian diffusion time  $\tau_0$  for various  $\phi$  at size ratios  $\delta$  of (a) 0.45 and (b) 0.36. Solid black lines indicate the scaling exponent  $\alpha$ , where  $\text{MSD} \propto \tau^\alpha$ . The MSD is diffusive when  $\alpha = 1$  and subdiffusive when  $\alpha < 1$ . The dashed lines represent the normalized tracking resolution  $\epsilon$ . The error bars indicate one standard deviation over at least four replicates per state point.

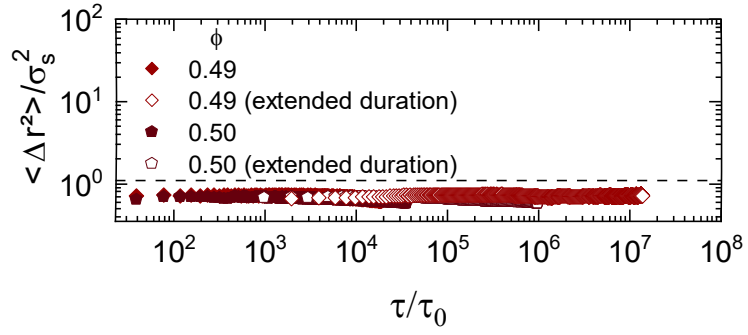

**Figure S2:** Normalized MSD  $\langle r^2 \rangle / \sigma_s^2$  as a function of normalized lag time  $\tau / \tau_0$ , where  $\tau_0$  is the Brownian diffusion time for the large tracer,  $\delta = 0.71$  at  $\phi = 0.49$  and  $0.50$ .

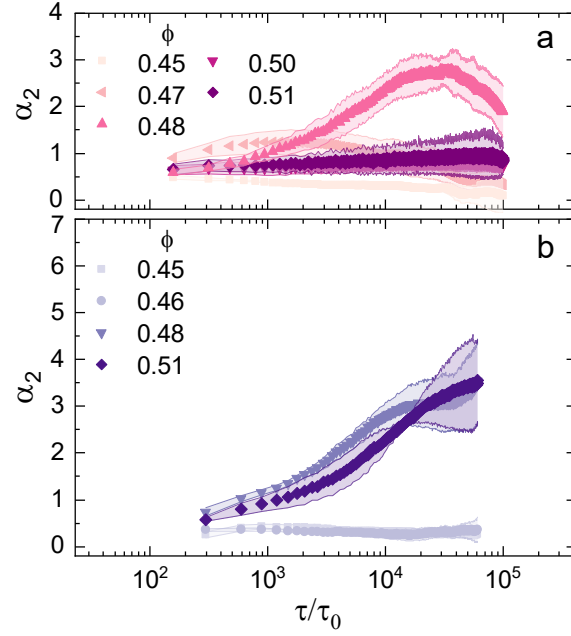

**Figure S3:** Non-Gaussian parameter  $\alpha_2$  as a function of normalized lag time  $\tau/\tau_0$ , where  $\tau_0$  is the Brownian diffusion time for each tracer, at various  $\phi$  for size ratio  $\delta$  values of (a) 0.45 and (b) 0.36. The error bars indicate one standard deviation over at least four replicates per state point.

## Differential dynamic microscopy

| $\delta$ | $\phi$      | $\Delta x$ ( $\mu\text{m}$ ) | $q_{\min}$ ( $\mu\text{m}^{-1}$ ) |
|----------|-------------|------------------------------|-----------------------------------|
| 0.71     | $\leq 0.45$ | 0.228                        | 0.108                             |
| 0.71     | $> 0.45$    | 0.152                        | 0.161                             |
| 0.45     | $\geq 0.45$ | 0.114                        | 0.215                             |
| 0.36     | $\leq 0.46$ | 0.114                        | 0.215                             |
| 0.36     | $> 0.46$    | 0.091                        | 0.270                             |
| 0.34     | $\leq 0.45$ | 0.091                        | 0.270                             |
| 0.34     | $> 0.45$    | 0.076                        | 0.323                             |

**Table S2:** Pixel size  $\Delta x$  and theoretical minimum  $q_{\min}$  for the various samples.

| $\phi = 0.45$   |      |                 |      |                 |      |                 |      | $\phi = 0.46$   |      |                 |      |
|-----------------|------|-----------------|------|-----------------|------|-----------------|------|-----------------|------|-----------------|------|
| $\delta = 0.71$ |      | $\delta = 0.45$ |      | $\delta = 0.36$ |      | $\delta = 0.34$ |      | $\delta = 0.36$ |      | $\delta = 0.34$ |      |
| $q\sigma_s$     | $s$  |
| 0.07            | 0.82 | 0.07            | 0.92 | 0.07            | 0.90 | 0.06            | 0.80 | 0.07            | 0.91 | 0.06            | 0.91 |
| 0.11            | 0.91 | 0.11            | 0.92 | 0.08            | 0.85 | 0.09            | 0.80 | 0.08            | 1.0  | 0.09            | 1.0  |
| 0.15            | 0.91 | 0.14            | 0.94 | 0.09            | 0.82 | 0.12            | 0.85 | 0.09            | 1.0  | 0.12            | 0.99 |
| 0.24            | 0.91 | 0.16            | 0.93 | 0.11            | 0.82 | 0.14            | 0.66 | 0.11            | 0.98 | 0.14            | 0.97 |
| 0.39            | 0.90 | 0.22            | 0.94 | 0.15            | 0.88 | 0.21            | 0.67 | 0.22            | 0.81 | 0.23            | 0.86 |
| 0.56            | 0.88 | 0.27            | 0.94 | 0.18            | 0.88 | 0.23            | 0.78 | 0.26            | 0.75 | 0.27            | 0.78 |
| 0.73            | 0.83 | 0.33            | 0.93 | 0.22            | 0.75 |                 |      |                 |      |                 |      |
| 0.90            | 0.78 | 0.38            | 0.93 | 0.26            | 0.89 |                 |      |                 |      |                 |      |
| 1.04            | 0.71 | 0.43            | 0.92 |                 |      |                 |      |                 |      |                 |      |
| 1.24            | 0.59 | 0.50            | 0.88 |                 |      |                 |      |                 |      |                 |      |
| $\phi = 0.47$   |      |                 |      |                 |      | $\phi = 0.48$   |      | $\phi = 0.49$   |      | $\phi = 0.50$   |      |
| $\delta = 0.71$ |      | $\delta = 0.45$ |      | $\delta = 0.34$ |      | $\delta = 0.36$ |      | $\delta = 0.34$ |      | $\delta = 0.34$ |      |
| $q\sigma_s$     | $s$  |
| 0.07            | 0.80 | 0.07            | 0.81 | 0.06            | 0.83 | 0.07            | 0.74 | 0.06            | 0.66 | 0.06            | 0.63 |
| 0.10            | 0.71 | 0.11            | 0.78 | 0.09            | 0.70 | 0.08            | 0.72 | 0.09            | 0.61 | 0.10            | 0.52 |
| 0.16            | 0.63 | 0.16            | 0.74 | 0.12            | 0.70 | 0.10            | 0.62 | 0.14            | 0.63 | 0.16            | 0.40 |
| 0.23            | 0.62 | 0.22            | 0.74 | 0.14            | 0.63 | 0.15            | 0.51 | 0.20            | 0.64 |                 |      |
| 0.36            | 0.60 | 0.38            | 0.61 | 0.23            | 0.65 | 0.20            | 0.46 | 0.23            | 0.59 |                 |      |

**Table S3:** Stretching exponent  $s$  from fits of the ISFs to a stretched exponential function  $f(q, \tau) = \exp\{-[\Gamma(q)\tau]^s\}$  at specified normalized wavevectors  $q\sigma_s$  for various samples.

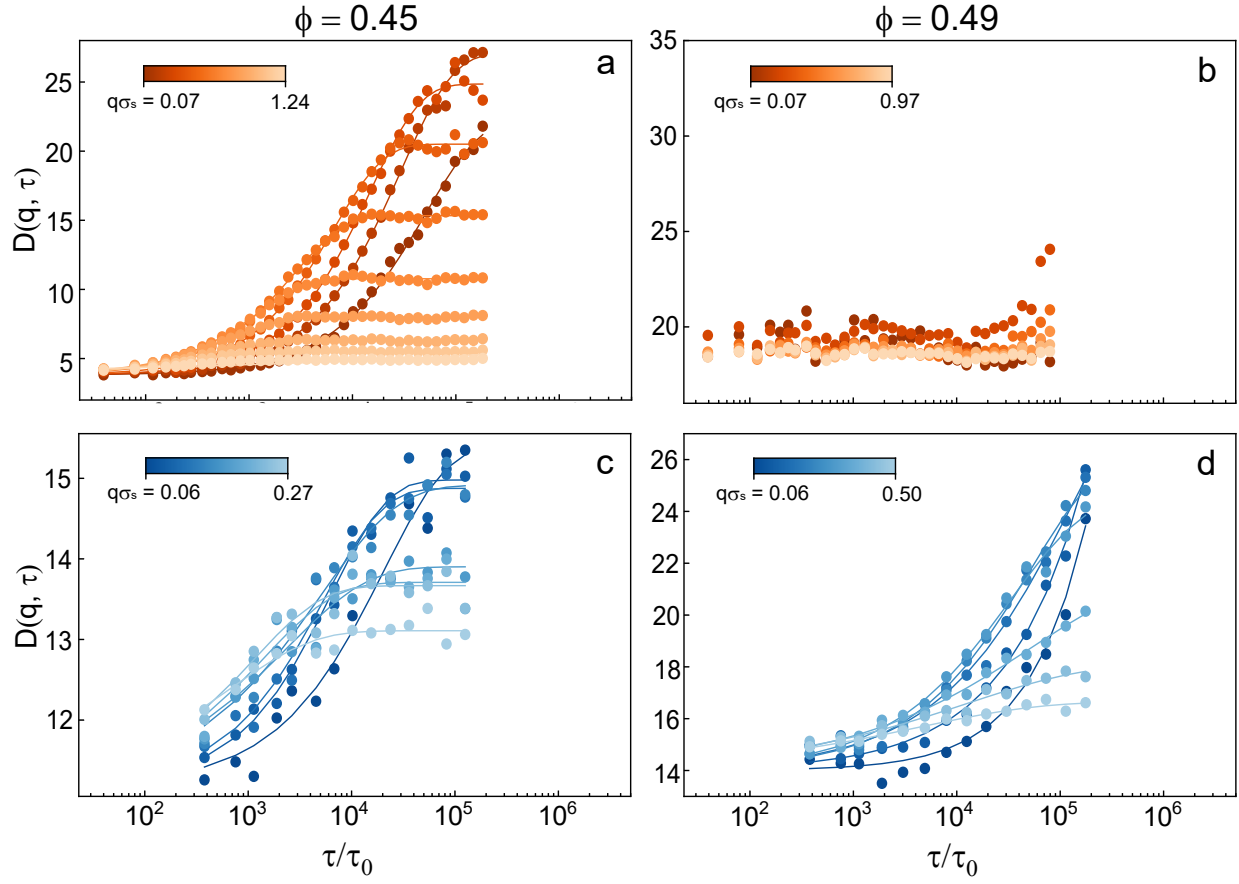

**Figure S4:** DDM structure function  $D(q, \Delta\tau)$  for (a)  $(\delta, \phi) = (0.71, 0.45)$ , (b)  $(\delta, \phi) = (0.71, 0.49)$ , (c)  $(\delta, \phi) = (0.34, 0.45)$ , and (d)  $(\delta, \phi) = (0.34, 0.49)$ .

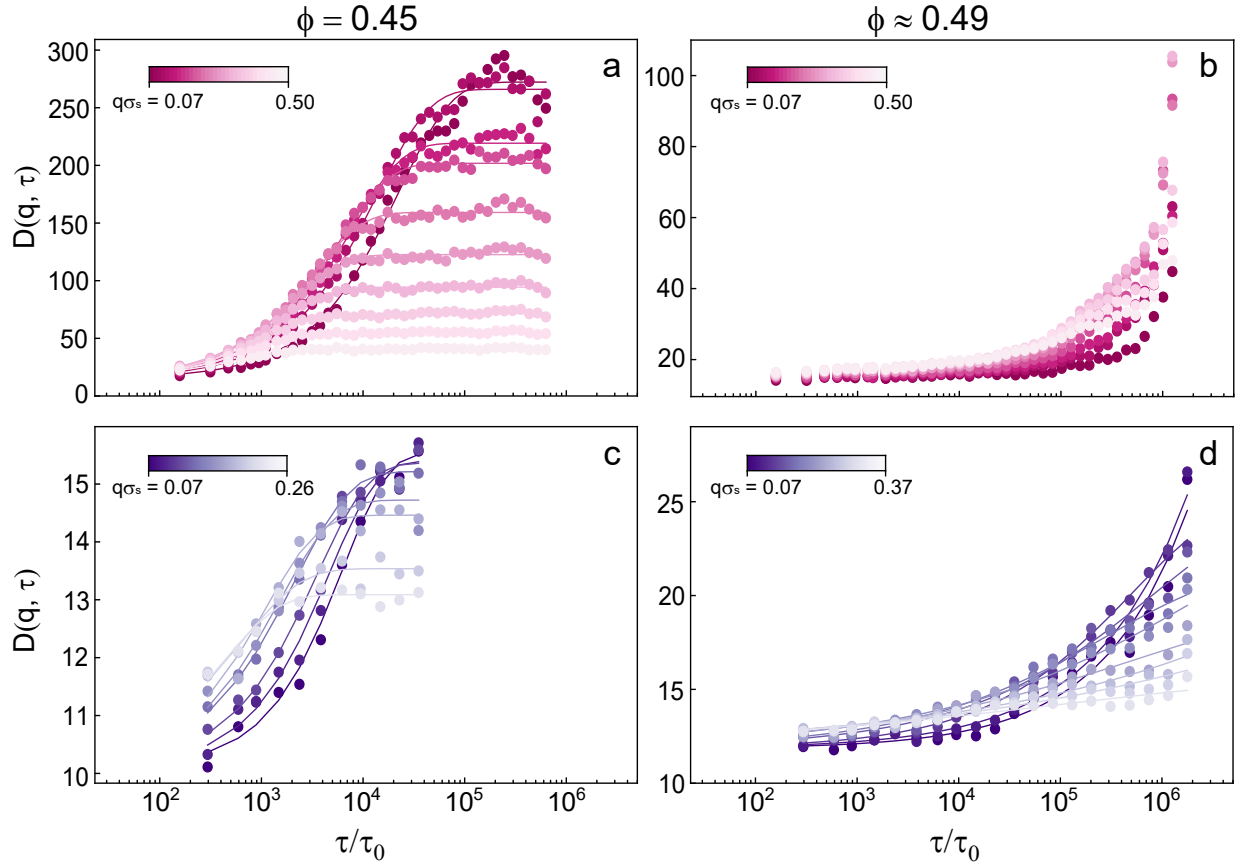

**Figure S5:** DDM structure function  $D(q, \Delta\tau)$  for (a)  $(\delta, \phi) = (0.45, 0.45)$ , (b)  $(\delta, \phi) = (0.45, 0.49)$ , (c)  $(\delta, \phi) = (0.36, 0.45)$ , and (d)  $(\delta, \phi) = (0.36, 0.48)$ .



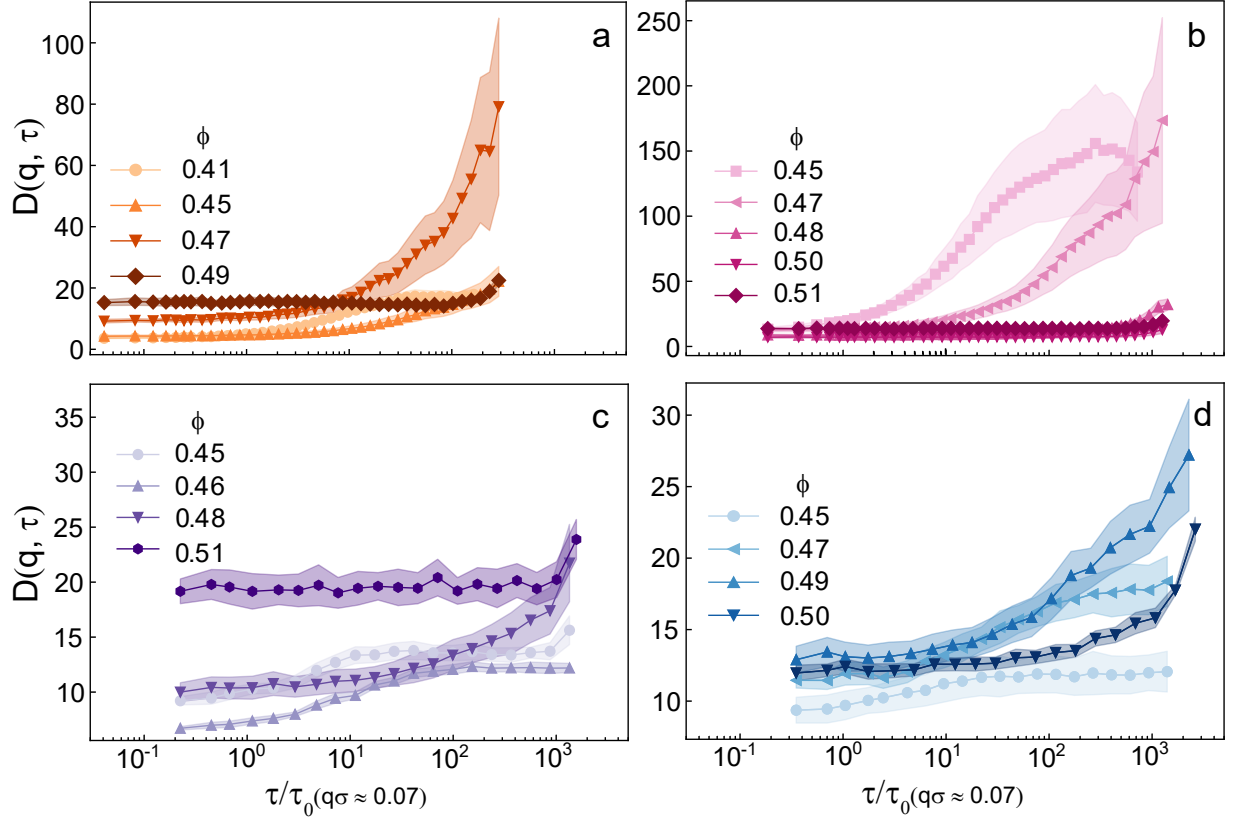

**Figure S6:** DDM structure function  $D(q, \Delta\tau)$  as a function of  $\tau/\tau_0$  and  $\phi$  at  $q\sigma_s \sim 0.07$  for (a)  $\delta = 0.71$ , (b)  $\delta = 0.45$ , (c)  $\delta = 0.36$ , and (d)  $\delta = 0.34$ . The error bars correspond to standard deviation of the averaged measurements.

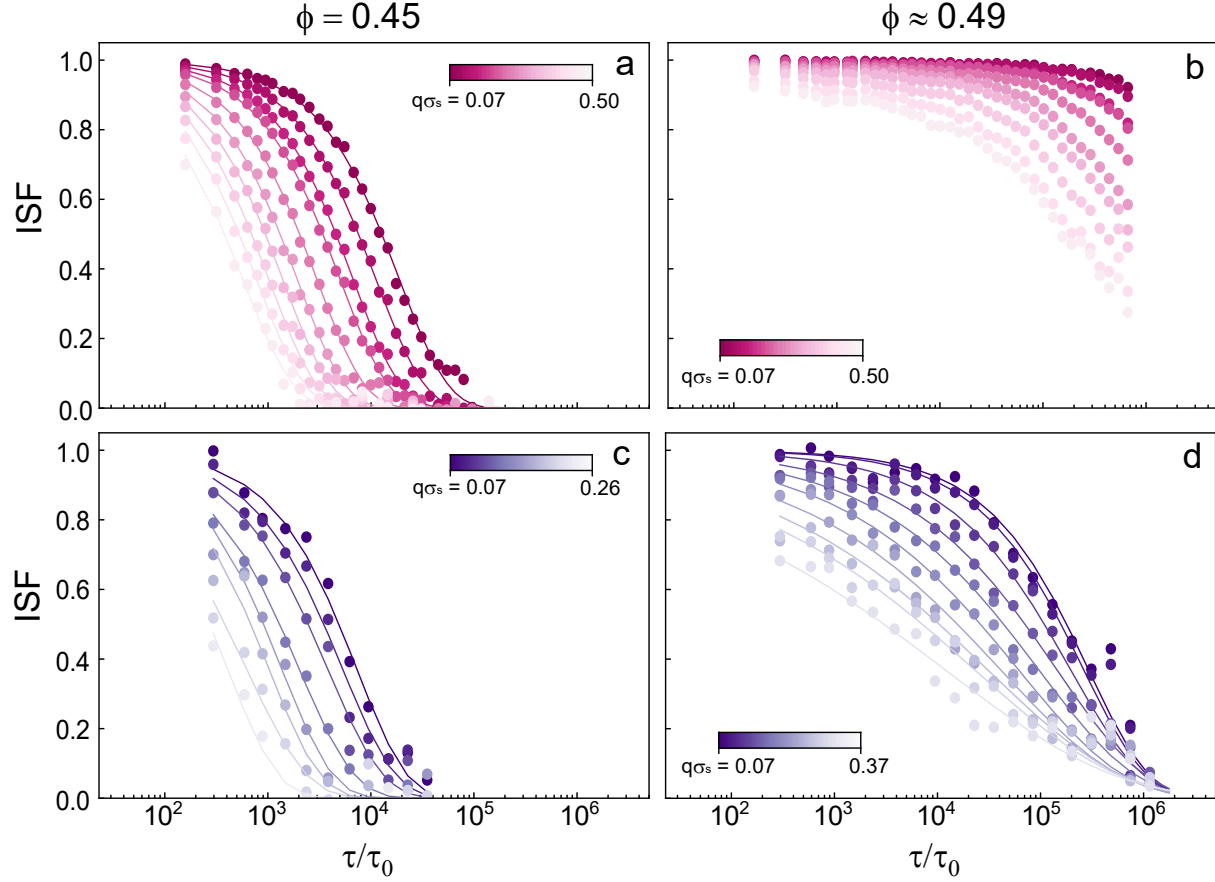

**Figure S7:** Collective intermediate scattering function  $f(q, \tau)$  as a function of normalized lag  $\tau/\tau_0$  for exhibits single exponential decay for  $(\delta, \phi) =$  (a) (0.45, 0.45), (b) (0.45, 0.49), (c) (0.36, 0.45), and (d) (0.36, 0.48). The lines in (a), (c), and (d) indicate fits of the data to a single exponential decay.

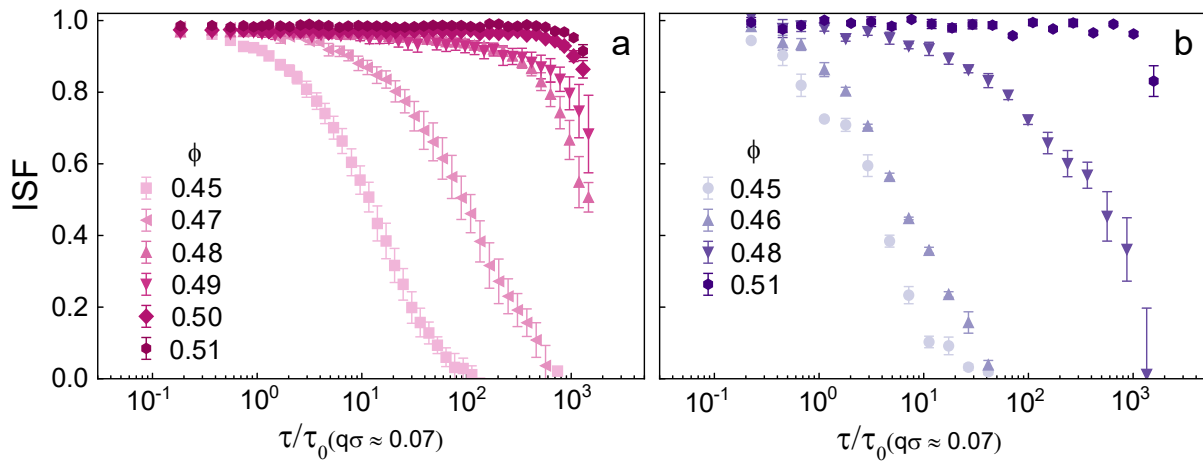

**Figure S8:** Intermediate scattering function  $f(q, \tau)$  as a function of  $\tau/\tau_0$  and  $\phi$  at  $q\sigma_s \sim 0.07$  for  $\delta$  of (a) 0.45 and (b) 0.36. The error bars correspond to standard deviation of the averaged measurements.

## Comparison of self-intermediate scattering functions from DDM and SPT

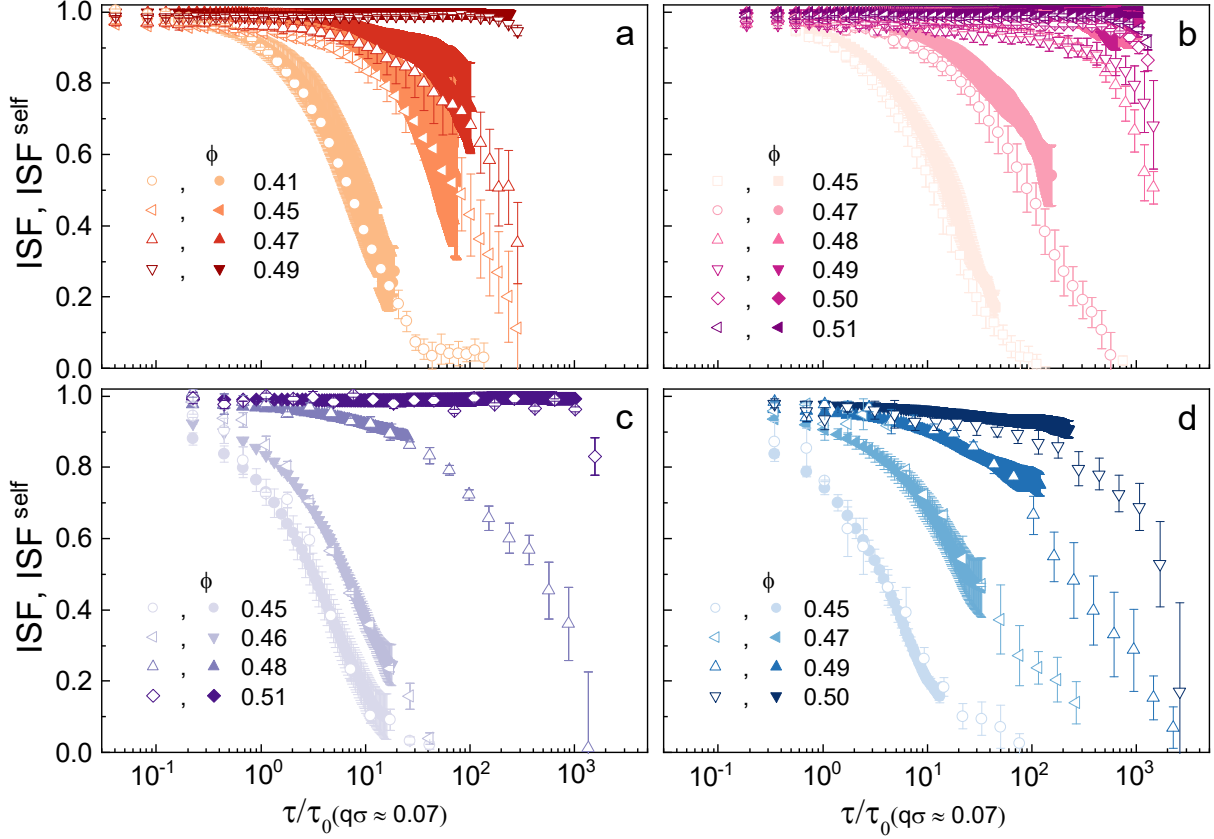

**Figure S9:**  $f(q, \tau)$  and  $f^{\text{self}}(q, \tau)$  as a function of  $\tau/\tau_0$  and  $\phi$  at  $q\sigma_s \sim 0.07$  for (a)  $\delta = 0.71$ , (b)  $\delta = 0.45$ , (c)  $\delta = 0.36$ , and (d)  $\delta = 0.34$ . Open symbols represent  $f(q, \tau)$ , and closed symbols represent  $f^{\text{self}}(q, \tau)$ . The error bars correspond to standard deviation of the averaged measurements.  $f^{\text{self}}(q, \tau)$  was calculated from tracer trajectories obtained from SPT using  $f^{\text{self}}(q, \tau) = \frac{1}{N} \sum_{m=1}^N \langle e^{-j\mathbf{q} \cdot [\mathbf{r}_m(t_0+\tau) - \mathbf{r}_m(t_0)]} \rangle_{|\mathbf{q}|=q, t_0}$ .

## Effective diameter mapping

To account for the electrostatic interactions between particles, we calculate the repulsive potential  $\beta U(D) = \pi \sigma_{\text{nom}} \epsilon \zeta^2 \exp(-\kappa D)$  as a function of distance  $D$  between particle surfaces in the low surface charge limit, where  $\beta = (k_B T)^{-1}$  is the inverse thermal energy,  $\sigma_{\text{nom}}$  is the nominal particle diameter,  $\epsilon$  is the solvent permittivity, and  $\kappa^{-1}$  is the Debye screening length. The suspensions were prepared in deionized water, but no care was taken to ensure that suspensions were near-salt-free. Thus, we calculate the repulsive potential for  $\kappa^{-1} = 1$  nm and 10 nm, which approximately span the values reported for DI water in a non-salt-free environment. The effective hard sphere diameter  $\sigma_t$  is then obtained using the Barker-Henderson formalism<sup>3</sup>  $\sigma_{\text{eff}} = \sigma_{\text{nom}} + \int [1 - \exp\{-\beta U(D)\}] dD$ . The nominal sizes  $\sigma_{\text{nom}}$ , zeta potentials  $\zeta$ , and calculated effective sizes  $\sigma_{\text{eff}}$  are shown in Table S4 and S5.

| $\sigma_{\text{nom}}$ (nm) | $\zeta$ (mV) | $\sigma_{\text{eff}}$ (nm) | $\delta_{\text{nom}}$ | $\delta_{\text{eff}}$ |
|----------------------------|--------------|----------------------------|-----------------------|-----------------------|
| 47                         | -21 $\pm$ 6  | 50.0 $\pm$ 0.5             | 0.34                  | 0.34                  |
| 51                         | -27 $\pm$ 3  | 54.6 $\pm$ 0.2             | 0.36                  | 0.38                  |
| 63                         | -37 $\pm$ 3  | 67.5 $\pm$ 0.2             | 0.45                  | 0.46                  |
| 100                        | -40 $\pm$ 4  | 105.1 $\pm$ 0.2            | 0.71                  | 0.72                  |
| 120                        | -39 $\pm$ 4  | 125.2 $\pm$ 0.2            | -                     | -                     |
| 140                        | -37 $\pm$ 6  | 145.3 $\pm$ 0.3            | -                     | -                     |

**Table S4:** Nominal particle diameter  $\sigma_{\text{nom}}$ , zeta potential  $\zeta$ , effective diameter  $\sigma_{\text{eff}}$ , nominal size ratio  $\delta_{\text{nom}}$  and effective size ratio  $\delta_{\text{eff}}$  for Debye length  $\kappa^{-1} = 1$  nm

| $\sigma_{\text{nom}}$ (nm) | $\zeta$ (mV) | $\sigma_{\text{eff}}$ (nm) | $\delta_{\text{nom}}$ | $\delta_{\text{eff}}$ |
|----------------------------|--------------|----------------------------|-----------------------|-----------------------|
| 47                         | -21 $\pm$ 6  | 77 $\pm$ 5                 | 0.34                  | 0.40                  |
| 51                         | -27 $\pm$ 3  | 87 $\pm$ 2                 | 0.36                  | 0.45                  |
| 63                         | -37 $\pm$ 3  | 107 $\pm$ 2                | 0.45                  | 0.56                  |
| 100                        | -40 $\pm$ 4  | 151 $\pm$ 2                | 0.71                  | 0.78                  |
| 120                        | -39 $\pm$ 4  | 172 $\pm$ 2                | -                     | -                     |
| 140                        | -37 $\pm$ 6  | 192 $\pm$ 3                | -                     | -                     |

**Table S5:** Nominal particle diameter  $\sigma_{\text{nom}}$ , zeta potential  $\zeta$ , effective diameter  $\sigma_{\text{eff}}$ , nominal size ratio  $\delta_{\text{nom}}$  and effective size ratio  $\delta_{\text{eff}}$  for Debye length  $\kappa^{-1} = 10$  nm

## Determination of logarithmic relaxations

Logarithmic relaxations were identified by fitting  $f(q, \tau)$  data for each wavevector to the logarithmic function:  $f(q, \tau) = a \cdot \ln(\tau) + b$ , where  $a$  and  $b$  are fitting parameters. We classified a given  $f(q, \tau)$  curve as exhibiting a logarithmic relaxation if the fit could be successfully performed over at least two decades in time. Figure S10 shows examples of the logarithmic fits applied to selected  $f(q, \tau)$  curves.

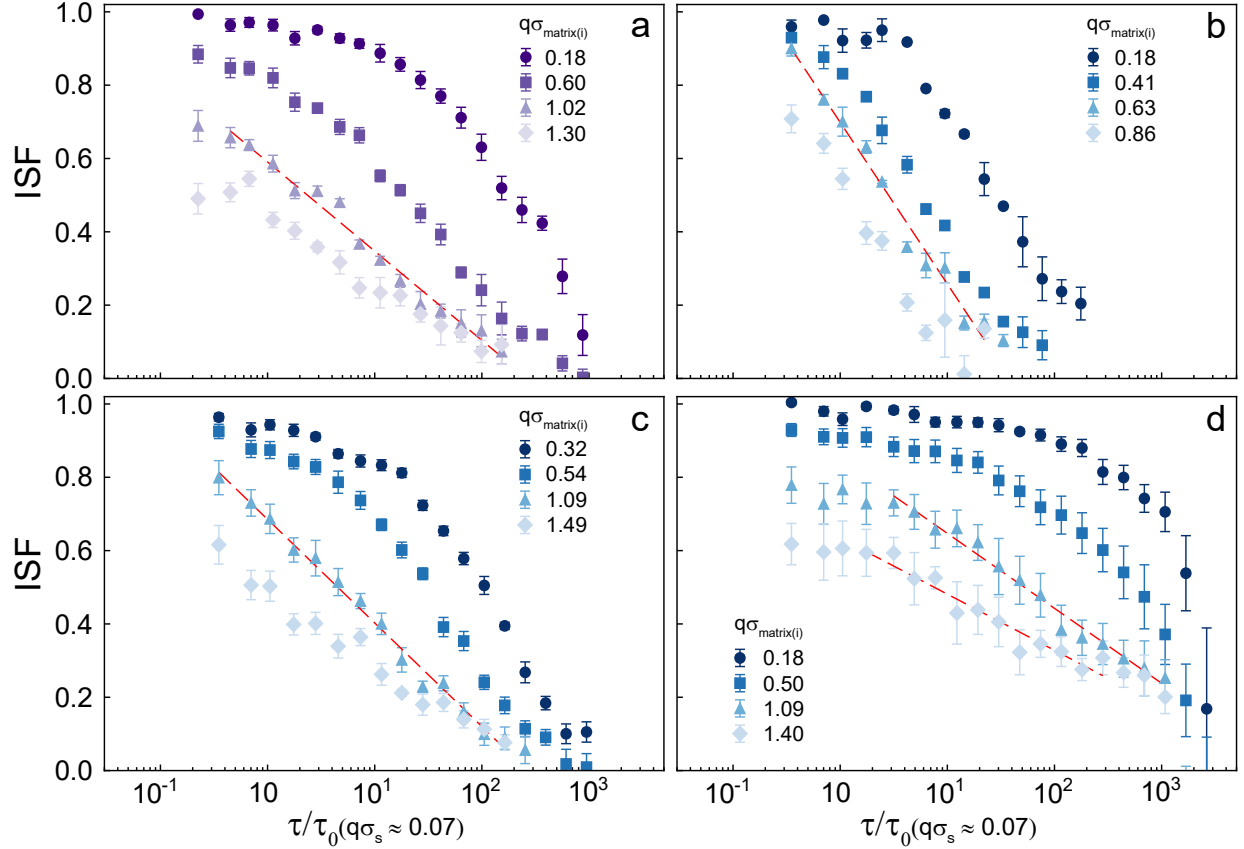

**Figure S10:** Intermediate scattering function  $f(q, \tau)$  as a function of  $\tau/\tau_0$  and  $\phi$  at  $q\sigma_s \sim 0.07$  for exhibiting anomalous logarithmic decays of  $f(q, \tau)$  for at least two decades in time for (a)  $(\delta, \phi) = (0.36, 0.48)$ , (b)  $(\delta, \phi) = (0.34, 0.47)$ , (c)  $(\delta, \phi) = (0.34, 0.49)$  and (d)  $(\delta, \phi) = (0.34, 0.50)$ . The error bars correspond to standard deviation of the averaged measurements.

| $\delta$ | $\phi$ | $q^* \sigma_{\text{matrix}(i)}$ | $L^* (\sigma_{\text{matrix}(i)})$ | Number of time decades |
|----------|--------|---------------------------------|-----------------------------------|------------------------|
| 0.34     | 0.47   | 0.63                            | 9.93                              | 2                      |
|          | 0.49   | 1.09                            | 5.76                              | 2.5                    |
|          | 0.50   | 1.09                            | 5.76                              | 2.5                    |
|          | 0.50   | 1.40                            | 4.49                              | 2                      |
| 0.36     | 0.48   | 1.02                            | 6.16                              | 2.5                    |

**Table S6:** Samples exhibiting anomalous logarithmic decays of in  $f(q, \tau)$  of at least two decades in time: wave vector  $q^* \sigma_{\text{matrix}(i)}$ , corresponding length scale in units of  $\sigma_{\text{matrix}(i)}$  and time span of decay

## References

- [1] W. C. K. Poon, E. R. Weeks and C. P. Royall, *Soft Matter*, 2012, **8**, 21–30.
- [2] F. Giavazzi, V. Trappe and R. Cerbino, *Journal of Physics: Condensed Matter*, 2020, **33**, 024002.
- [3] J. A. Barker and D. Henderson, *The Journal of Chemical Physics*, 1967, **47**, 2856–2861.
